# Supplementary material for: Seasonal Variation in the Skin Transcriptome of Common Bottlenose Dolphins (Tursiops truncatus) from the Northern Gulf of Mexico
Source: PLoS One. 2015 Jun 25;10(6):e0130934. doi: 10.1371/journal.pone.0130934 (PMC4482424; doi:10.1371/journal.pone.0130934)
Supplement: S5 Table — (XLS) [file pone.0130934.s005.xls]

## Sheet: Sheet1
S5 Table. Probes differentially in Spring vs Summer 2010 (annotated probes listed only).
UP = upregulated in summer; DOWN = downregulated in summer relative to spring.
E-value is the Expect value of the top BLASTx hit.
p(corr) - p-value corrected for multiple testing (Benjanini-Hochburg)
FC (abs) - absolute fold change
UP
ProbeName	p (Corr)	FC (abs)	Regulation	Target ID	Description	E-value
AM-2323	0.00168988	2.04815	up	Contig-c1569-1	a chain cathepsin l with a nitrile inhibitor	6.04e-51
AM-8151	0.000273786	1.60018	up	Contig-c5636-1	acyl-coenzyme a very long chain	3.93e-53
AM-8921	8.03136e-05	1.6106	up	Contig-c6341-1	acyl-coenzyme a very long isoform cra_c	4.63e-07
AM-23070	0.00128494	1.60353	up	Contig-c20175-1	adducin 3	4.18e-30
AM-33688	1.82677e-05	1.54122	up	SRR027945.10135	adp-ribosylation factor-like 13b	4.47e-11
AM-24959	0.000469443	1.60698	up	Contig-c22105-1	amyloid beta a4 isoform 2	3.45e-05
AM-2109	0.00108921	2.21556	up	Contig-c1436-1	androgen-induced 1	2.25e-49
AM-1355	0.000164508	1.50784	up	Contig-c964-1	bax inhibitor 1	2.46e-44
AM-99	5.30549e-05	1.69948	up	Contig-c36-1	bcl2-associated athanogene 2	4.5e-39
AM-8626	0.00596354	1.72046	up	Contig-c6068-2	cd99 antigen-like	1.64e-14
AM-23328	0.00273247	1.8188	up	Contig-c20440-1	complement component q b chain	1.05e-38
AM-1683	0.0064731	1.66868	up	Contig-c1204-1	cysteine and glycine-rich protein 2	2.33e-86
AM-30739	6.4454e-06	1.78496	up	SRR027946.47775	cytochrome b-c1 complex subunit 10	2.56e-26
AM-5190	0.00014013	1.94968	up	Contig-c3055-1	electrogenic sodium bicarbonate cotransporter 1	6.9e-38
AM-9952	2.65411e-05	1.53885	up	Contig-c7287-1	eukaryotic translation elongation factor 1 epsilon 1	7.59e-117
AM-9909	0.000136089	1.97049	up	Contig-c7245-1	fc fragment of low affinity receptor	3.63e-72
AM-24863	0.00426487	1.56355	up	Contig-c22009-1	guanylate cyclase soluble subunit alpha-3	2.24e-16
AM-11659	0.00197624	1.50725	up	Contig-c8952-1	kinesin light chain 1	4.72e-12
AM-22966	0.00455866	1.54184	up	Contig-c20065-1	lymphocyte antigen 96	4.81e-33
AM-8211	4.02867e-05	1.99242	up	Contig-c5690-1	macro domain-containing protein 1	3.75e-41
AM-41	0.000576419	2.89987	up	Contig-c4-5	mhc class ii antigen	2.69e-169
AM-648	0.0076372	4.07613	up	Contig-c412-1	mhc class ii antigen	8.8e-23
AM-13951	0.0050207	1.50121	up	Contig-c11012-1	microsomal glutathione s-transferase 1	5.88e-25
AM-3332	9.30869e-05	1.64776	up	Contig-c2072-1	mit domain-containing protein 1-like	3.28e-33
AM-10374	2.97029e-05	1.6523	up	Contig-c7698-1	myeloid lymphoid or mixed-lineage leukemia (trithorax drosophila) translocated 10	6.93e-32
AM-1265	0.000411412	1.65736	up	Contig-c922-1	na+ k+ beta 1 polypeptide	5.29e-50
AM-11995	5.80549e-05	1.58868	up	Contig-c9281-1	n-acylethanolamine-hydrolyzing acid amidase	1.11e-26
AM-25770	1.66834e-05	1.60606	up	Contig-c22934-1	n-acylethanolamine-hydrolyzing acid amidase	5.57e-34
AM-7920	2.40007e-05	1.56166	up	Contig-c5434-1	nadh dehydrogenase	5.24e-47
AM-16047	0.0064731	1.99567	up	Contig-c13071-1	p150	4.13e-09
AM-7979	8.03136e-05	1.54889	up	Contig-c5484-1	poly binding cytoplasmic 4 (inducible form)	9.86e-38
AM-16139	0.0028603	1.51541	up	Contig-c13166-1	protein fam3b-like	4.82e-31
AM-9469	1.15984e-05	1.68561	up	Contig-c6829-1	ran guanine nucleotide release factor-like	1.58e-25
AM-21069	0.00194524	1.54955	up	Contig-c18137-1	rCG37107 [Rattus norvegicus]	0.000473
AM-23352	0.000646634	2.02038	up	Contig-c20464-1	retrovirus-related pol polyprotein line-1	0.000279
AM-6039	4.80481e-06	1.50122	up	Contig-c3831-1	retrovirus-related pol polyprotein line-1	1.74e-06
AM-30720	0.00452458	1.73292	up	gi-77992069	retrovirus-related pol polyprotein line-1	3.41e-18
AM-27207	0.000651476	1.57607	up	Contig-c24423-1	rho gtpase-activating protein 18	5.64e-22
AM-20958	0.00408379	1.56669	up	Contig-c18023-1	rho gtpase-activating protein 18	3.45e-18
AM-2862	7.24913e-07	1.77897	up	Contig-c1776-2	ribosomal protein l23	1.97e-85
AM-7262	0.000210532	2.4553	up	Contig-c4878-1	sarcospan isoform 1	3.73e-35
AM-15802	0.000269515	1.58736	up	Contig-c12824-1	serotransferrin precursor	1.24e-18
AM-12935	0.00109511	1.56072	up	Contig-c10096-4	serotransferrin precursor	5.34e-81
AM-20865	4.01856e-05	2.33526	up	Contig-c17932-1	sodium calcium exchanger 1 precursor	1.98e-15
AM-11196	0.0030363	1.65874	up	Contig-c8498-1	transcription elongation factor a 3	5.62e-51
AM-6433	0.00573197	1.52302	up	Contig-c4198-1	transcription factor ap-1	9.57e-16
AM-32832	0.000133594	1.60768	up	SRR027947.166007	transferrin	3.64e-09
AM-6810	8.95689e-05	1.62236	up	Contig-c4559-1	tropomyosin alpha-1 chain	1.86e-144
AM-13860	0.000185022	1.51958	up	Contig-c10922-1	udp-glucose pyrophosphorylase 2	6.44e-54
DOWN
ProbeName	p (Corr)	FC (abs)	Regulation	Target ID	Description	E-value
AM-19101	1.84678e-07	5.74599	down	Contig-c16158-1	60s ribosomal protein l27a-like	9.53e-06
AM-13772	4.6905e-08	4.69275	down	Contig-c10839-1	aldo-keto reductase family 1 member c1 homolog	3.48e-23
AM-13179	7.92479e-05	1.665	down	Contig-c10281-16	antithrombin-iii precursor	4.65e-82
AM-22531	8.66863e-05	1.81686	down	Contig-c19620-1	baculoviral iap repeat-containing protein 1	2.59e-06
AM-25984	0.000425795	1.68272	down	Contig-c23153-1	chromosome 6 open reading frame 52	2.73e-25
AM-25804	2.1295e-07	2.69259	down	Contig-c22969-1	cleavage and polyadenylation specificity factor subunit 6	1.64e-24
AM-20184	0.000352495	1.59615	down	Contig-c17251-1	coiled-coil domain-containing protein 15	3.29e-41
AM-15605	0.00670512	2.03955	down	Contig-c12621-1	corticosteroid 11-beta-dehydrogenase isozyme 1	1.18e-14
AM-3598	2.58898e-05	2.14256	down	Contig-c2259-1	cytochrome family subfamily polypeptide 1	4.6e-34
AM-15418	0.00952795	1.51436	down	Contig-c12430-1	cytochrome p450 3a89	1.75e-24
AM-16795	0.00213919	1.59179	down	Contig-c13818-1	endonuclease reverse transcriptase	7.84e-10
AM-7539	0.000439424	1.51872	down	Contig-c5110-1	eukaryotic translation initiation factor 5b	7.41e-87
AM-7002	0.0010551	1.86836	down	Contig-c4679-1	gmp reductase 1	1.81e-20
AM-26719	0.00802193	1.63613	down	Contig-c23912-1	gmp reductase 1	1.14e-36
AM-31929	0.000115279	2.19966	down	SRR027948.49665	hCG2040404 [Homo sapiens]	6.99e-12
AM-19964	0.000102171	2.02271	down	Contig-c17028-1	hemoglobin subunit epsilon-like	3.47e-33
AM-12789	0.00112904	1.74336	down	Contig-c9988-1	homogentisate -dioxygenase	1.77e-36
AM-20210	0.00931996	1.8727	down	Contig-c17278-1	IL-18 [Nyctereutes procyonoides]	9.93e-10
AM-12040	0.00526979	1.71535	down	Contig-c9325-1	interleukin 18	2.14e-84
AM-11352	0.0002409	1.65714	down	Contig-c8645-1	line-1 type transposase domain-containing protein 1-like	6.79e-12
AM-12077	0.00788458	1.65831	down	Contig-c9364-1	low quality protein: nebulin	1.04e-25
AM-134	0.00188152	1.73415	down	Contig-c56-1	nebulin	0
AM-8942	0.00053286	2.1504	down	Contig-c6360-1	nebulin	1.06e-14
AM-8118	0.00588525	1.80265	down	Contig-c5605-1	nebulin	2.91e-48
AM-9192	0.00337774	1.85926	down	Contig-c6567-1	nebulin	8.15e-61
AM-8597	0.00255282	1.69025	down	Contig-c6040-1	nebulin	1.85e-110
AM-10647	0.00459512	1.7699	down	Contig-c7964-1	nebulin isoform 2	1.15e-29
AM-34349	5.80549e-05	1.687	down	SRR027948.167621	orf2-like protein	5.8e-05
AM-18292	7.78027e-05	1.61746	down	Contig-c15330-1	pancreatic alpha-amylase-like isoform 1	3.69e-42
AM-11021	8.95689e-05	1.77054	down	Contig-c8327-1	peptidyl-trna hydrolase 2	1.45e-20
AM-11437	1.06292e-05	1.84471	down	Contig-c8730-1	PREDICTED: uncharacterized protein LOC100848083 [Bos taurus]	1.31e-05
AM-13603	0.0013165	2.182	down	Contig-c10671-1	protein c	6.71e-29
AM-16583	2.78494e-06	2.77101	down	Contig-c13610-1	ras guanyl-releasing protein 2	3.4e-19
AM-19182	0.000337009	1.67606	down	Contig-c16240-1	retrovirus-related pol polyprotein line-1	4.63e-06
AM-1482	3.61832e-05	1.50212	down	Contig-c1059-1	ring finger and spry domain-containing protein 1	8.27e-16
AM-28062	2.84458e-06	1.75487	down	Contig-c25323-1	serine threonine-protein kinase mak isoform 2	4.76e-27
AM-496	0.00713845	2.28416	down	Contig-c271-1	sortilin-related receptor	1.11e-121
AM-7139	0.00497963	1.60955	down	Contig-c4787-4	titin isoform n2-b	0
AM-24570	0.00609114	2.1375	down	Contig-c21703-1	tyrosine-protein phosphatase non-receptor type 18 isoform 2	1.09e-23
AM-1054	0.000516295	1.71741	down	Contig-c721-1	unnamed protein product [Homo sapiens]	2.06e-10
AM-7465	0.00621527	2.67823	down	Contig-c5049-1	uridine phosphorylase 1	6.87e-18
AM-17763	5.81014e-05	3.05108	down	Contig-c14791-1	zinc finger protein 347-like	8.17e-20
AM-26609	0.00917831	1.52935	down	Contig-c23794-1	zinc finger protein 551-like	6.06e-10
